# Supplementary material
Source: PubMed Central journal article supplement (PMC1797285)
Supplement: jbacter_189_3_902__1.pdf [file jbacter_189_3_902__1.pdf]

**TABLE S1. Primers used**

| Name       | Sequence                                           | Purpose                                                  |
|------------|----------------------------------------------------|----------------------------------------------------------|
| Chang380   | 5' -CCCCCGGATCCATGAGTGCAATAGAAAATTC-3'             | 5' primer for cloning MutS $\Delta$ 557-853 into pET21a  |
| Chang420   | 5' -GCCGCTCGAGCAGCACGTCGAGTTCGCCAG-3'              | 3' primer for cloning MutS $\Delta$ 557-853 into pET21a  |
| Chang462   | 5' -GCCGGAATTCATGAGTGCAATAGAAAATTC-3'              | 5' primer for cloning MutS into pASK-IBA33plus           |
| Chang465   | 5' -GAAGCTCGAGCACCAGGCTCTTCAAGCGATA-3'             | 3' primer for cloning MutS into pASK-IBA33plus           |
| ChangYGSTF | 5' -GCGCGCGGATCCATGCAAGCGTCGCAATTTTC-3'            | 5' primer for cloning MutYM25- $\Delta$ 1 into pGEX-4T-2 |
| Chang363   | 5' -GGACCGCTCGAGCTACTGTTTCGGTTTTTTGCCCCG-3'        | 3' primer for cloning MutYM25- $\Delta$ 1 into pGEX-4T-2 |
| Chang404   | 5' -AGCCGCGGATCCATTGACAAGACGCCCTAC-3'              | 5' primer for cloning MutYM25- $\Delta$ 2 into pGEX-4T-2 |
| Chang406   | 5' -CGGCGGCTCGAGTCAGCAGCGCGCCAGCACGCGTTT-3'        | 3' primer for cloning MutYM25- $\Delta$ 2 into pGEX-4T-2 |
| Chang448   | 5' -GAAGCCATGGGCATGCAAGCGTCGCAATTTTC-3'            | 5' primer for cloning MutY into pACYCDuet-1              |
| Chang449   | 5' -GAAGCTCGAGAACCGGCGCGCCAGTGCGTA-3'              | 3' primer for cloning MutY into pACYCDuet-1              |
| Chang388   | 5' -CGGCCGCTCGAGTCAGCTATTGTTGGCGGC-3' <sup>a</sup> | MutY primer for RT-PCR                                   |
| Chang440   | 5' -CGTCGTATCCGTTCCGTTGG-3'                        | 5' PCR primer for <i>rpoB</i> gene                       |
| Chang441   | 5' -TTCACCCGGATAACATCTCGTC-3'                      | 3' PCR primer for <i>rpoB</i> gene                       |
| Chang442   | 5' -CGTGTAGAGCGTGCGGTGAAA-3'                       | Sequencing primer for <i>rpoB</i> gene                   |

<sup>a</sup> The underlined sequence represents the antisense to MutY amino acids 211-215.
